# Supplementary material for: Better continental-scale streamflow predictions for Australia: LSTM as a land surface model post-processor and standalone hydrological model
Source: Copernicus journal article supplement (doi:10.5194/hess-30-757-2026), 2026-02-09
Supplement: Supplementary file [file hess-30-757-2026-supplement-title-page.pdf › hess-30-757-2026-supplement-title-page.pdf]

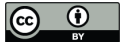

## *Supplement of*

# **Better continental-scale streamflow predictions for Australia: LSTM as a land surface model post-processor and standalone hydrological model**

**Ashkan Shokri et al.**

*Correspondence to:* Ashkan Shokri ([ash.shokri@csiro.au](mailto:ash.shokri@csiro.au))

- [hess-30-757-2026-supplement-title-page.pdf](#)
- [LSTM\\_c\\_soos\\_NSE.csv](#)
- [LSTM\\_c\\_toos\\_NSE.csv](#)
- [LSTM\\_c\\_tsoos\\_NSE.csv](#)
- [LSTM\\_qc\\_soos\\_NSE.csv](#)
- [LSTM\\_qc\\_toos\\_NSE.csv](#)
- [LSTM\\_qc\\_tsoos\\_NSE.csv](#)
- [awra\\_NSE.csv](#)
- [gr4j\\_soos\\_NSE.csv](#)
- [gr4j\\_toos\\_NSE.csv](#)
- [gr4j\\_tsoos\\_NSE.csv](#)
- [readme.txt](#)

The copyright of individual parts of the supplement might differ from the article licence.
